# Supplementary material for: Poly(2-ethyl-2-oxazoline-co-N-propylethylene imine)s by controlled partial reduction of poly(2-ethyl-2-oxazoline): synthesis, characterization and cytotoxicity
Source: Royal Society of Chemistry journal article supplement (doi:10.1039/d0py01258k), 2020-11-12
Supplement: d0py01258k1.pdf [file d0py01258k1.pdf]

## SUPPORTING INFORMATION

### **Poly(2-ethyl-2-oxazoline-co-N-propylethylene imine)s by controlled partial reduction of poly(2-ethyl-2-oxazoline): Synthesis, characterization and cytotoxicity**

Sebastian Halupczok<sup>1</sup>, Maria Pfister<sup>1\*#</sup>, Annemarie Ringhand<sup>1,\*</sup>, Corinna Fetsch<sup>1,‡</sup>, Alevtina Cubukova<sup>2</sup>, Antje Appelt-Menzel<sup>2,3</sup>, Robert Luxenhofer<sup>1,4</sup>

<sup>1</sup> *Polymer Functional Materials, Chair for Advanced Materials Synthesis, Department for Chemistry and Pharmacy, Julius-Maximilians-Universität Würzburg, Röntgenring 11, 97070 Würzburg, Germany*

<sup>2</sup> *Fraunhofer Institute for Silicate Research ISC, Translational Center Regenerative Therapies TLC-RT, Röntgenring 11, 97070 Würzburg, Germany*

<sup>3</sup> *University Hospital Würzburg, Chair Tissue Engineering and Regenerative Medicine (TERM), Röntgenring 11, 97070 Würzburg, Germany*

<sup>4</sup> *Soft Matter Chemistry, Department of Chemistry, University of Helsinki, 00014 Helsinki, Finland*

*correspondence to: robert.luxenhofer@uni-wuerzburg.de*

*# current address: Element Logic Germany GmbH, Hanns-Martin-Schleyer Straße 3, 74177 Bad Friedrichshall, Germany*

*‡ current address: Emil Kiessling GmbH, Am Ohlenberg 8, 64390 Erzhausen, Germany*

**Keywords:** *poly(2-oxazoline), cationic polymers, poly(N-propyl ethylenimine), reduction*

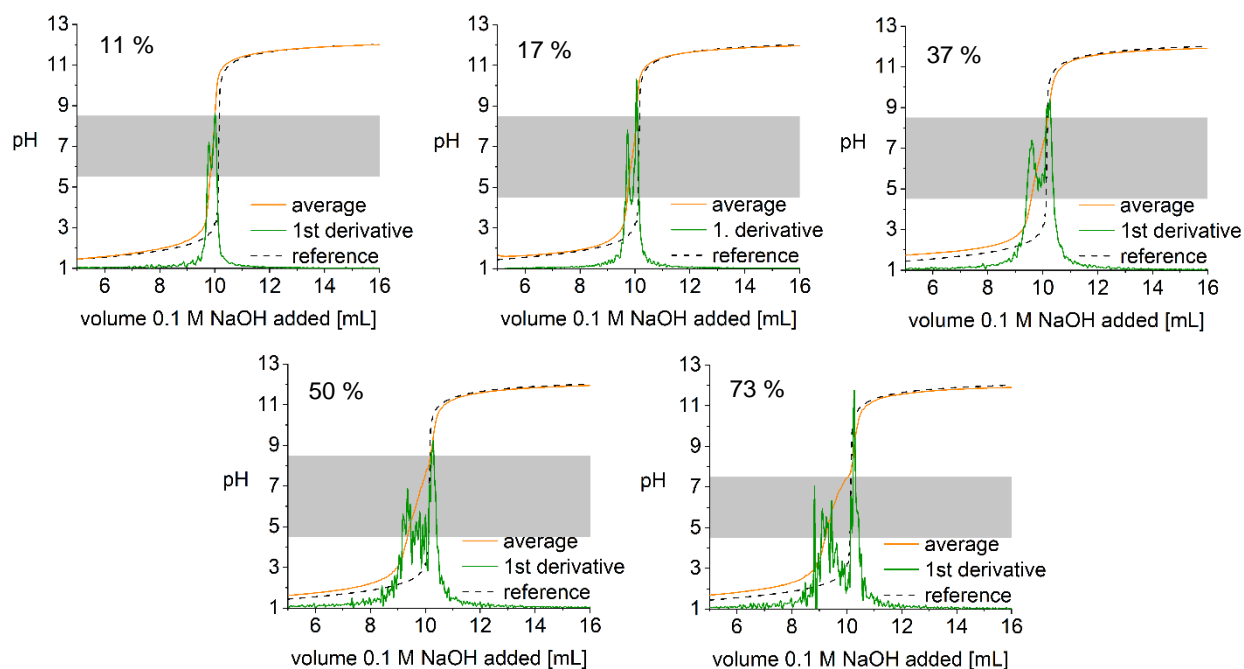

**Figure S1:** Titration curves at different degrees of reduction. The weight concentration of the polymers used in the titration was 2 mg/mL. The polymers were dissolved in 0.1 M HCl and were titrated with 0.1 M NaOH. The titrations were carried out in duplicate or triplicate and the averages of the titrations are shown in brown solid lines. The reference curve is in dotted lines. The first derivative with green solid lines tells the gradient of the titration curves and indicates the buffering area. Please note, at 10 mL titration volume, the syringe in the automated titrator had to be changed, which leads to an experimental artefact in the titration curves seen as a sudden increase in the pH values and corresponding large spike in the 1<sup>st</sup> derivative.

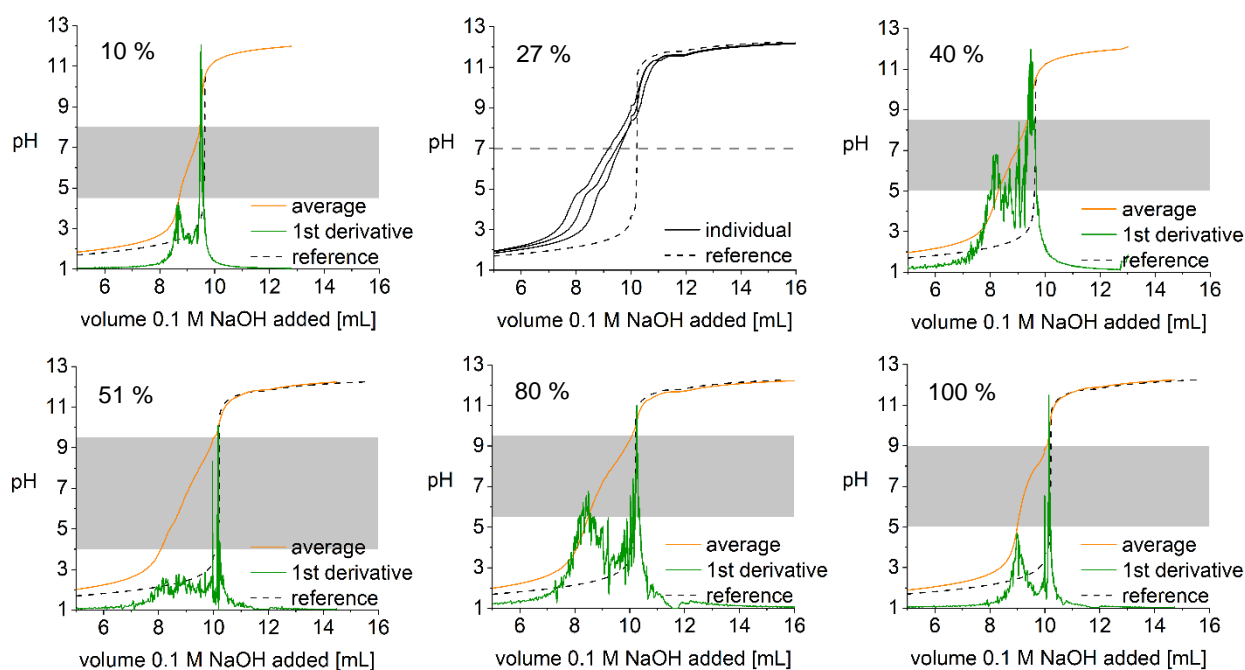

**Figure S2:** Titration curves at different degrees of reduction. The polymers were dissolved in 0.1 M HCl and were titrated with 0.1 M NaOH. The titrations were carried out in duplicate or triplicate and the averages of the titrations are shown in orange solid lines. The reference curve is in dotted lines. The first derivative with green solid lines tells the direction of the titration curves and the grey area indicates the pH buffer range. In the case of the copolymers with a degree of reduction of 27%, the polymer concentration was not consistent between the three titrations, therefore calculation of the average was not performed. Please note, at 10 mL titration volume, the syringe in the automated titrator had to be changed, which leads to an experimental artefact in the titration curves seen as a sudden increase in the pH values and corresponding large spike in the 1<sup>st</sup> derivative.

**Table S1:** Weight concentration of the titrations in Figure S2.

|                                          |   | m<br>(polymer)<br>[mg] | n<br>(polymer)<br>[nmol] | n (amine<br>groups)<br>[ $\mu$ mol] |
|------------------------------------------|---|------------------------|--------------------------|-------------------------------------|
| HCl 1                                    | 1 |                        |                          |                                     |
|                                          | 2 |                        |                          |                                     |
|                                          | 3 |                        |                          |                                     |
| 0% (=PEtOx)<br>49596 g mol <sup>-1</sup> | 1 | 42.9                   | 865                      | 0                                   |
|                                          | 2 | 41.2                   | 831                      | 0                                   |
|                                          | 3 | 41.5                   | 837                      | 0                                   |
| 27%<br>(47708)                           | 1 | 30.3                   | 635                      | 86                                  |
|                                          | 2 | 40.7                   | 853                      | 115                                 |
|                                          | 3 | 41.6                   | 872                      | 118                                 |
| 51%<br>(46031)                           | 1 | 30.0                   | 652                      | 166                                 |
|                                          | 2 | 30.4                   | 661                      | 169                                 |
|                                          | 3 |                        |                          |                                     |
| 80%+<br>(44003)                          | 1 | 30.8                   | 700                      | 280                                 |
|                                          | 2 | 30.6                   | 696                      | 278                                 |
|                                          | 3 | 30.5                   | 694                      | 277                                 |
| 100%<br>(42605)                          | 1 | 20.2                   | 474                      | 237                                 |
|                                          | 2 | 20.2                   | 474                      | 237                                 |
|                                          | 3 | 20.2                   | 474                      | 237                                 |
| HCl 2                                    | 1 |                        |                          |                                     |
|                                          | 2 |                        |                          |                                     |
|                                          | 3 |                        |                          |                                     |
| 10%**<br>(48897)                         | 1 | 110.5                  | $2.26 \cdot 10^{-6}$     | 113                                 |
|                                          | 2 | 110.1                  | $2.25 \cdot 10^{-6}$     | 113                                 |
|                                          | 3 | 110.7                  | $2.27 \cdot 10^{-6}$     | 113                                 |
| 40%**<br>(46800)                         | 1 | 40.0                   | $8.55 \cdot 10^{-7}$     | 171                                 |
|                                          | 2 | 40.0                   | $8.55 \cdot 10^{-7}$     | 171                                 |
|                                          | 3 | 40.0                   | $8.55 \cdot 10^{-7}$     | 171                                 |

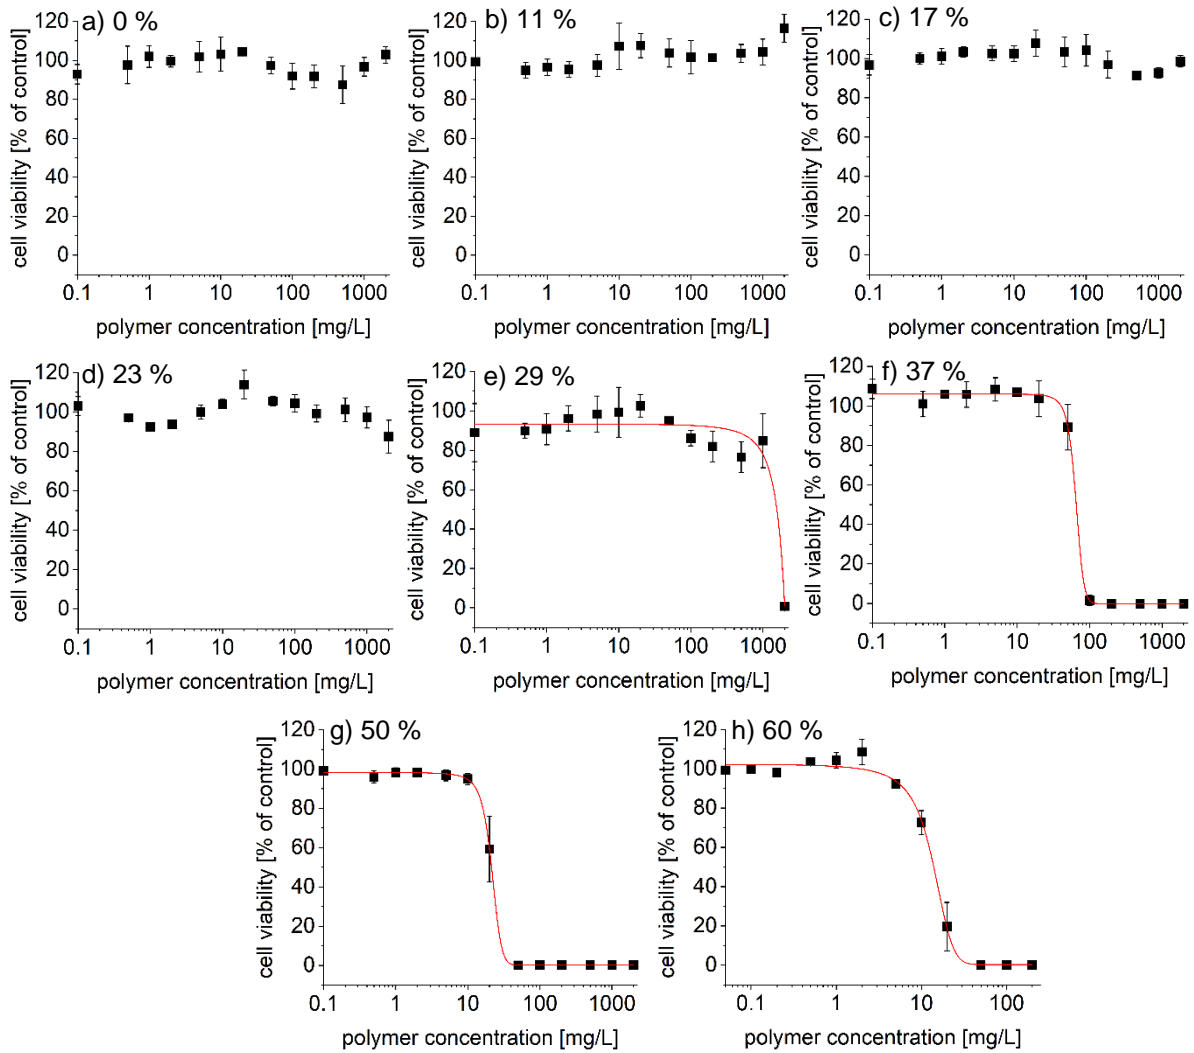

**Figure S3:** Cell viability tests of human dermal fibroblasts (hDF) exposed for 48 h to non-reduced PEtOx (a) and reduced PEtOx (b – h). Cytotoxicity was determined by CellTiter-Glo® Luminescent Cell Viability Assay. The data points are referred to the average of the tests carried out in triplicate with 3 independent biological assays. The sigmoidal red lines visualize the dose-response curves based on the resulting data points. The test substances were added covering a wide range of concentrations from 0.05 to 2000 µg/mL
